# Supplementary material
Source: PubMed Central journal article supplement (PMC8920534)
Supplement: NIHMS1782605-supplement-Supplement.pdf [file NIHMS1782605-supplement-Supplement.pdf]

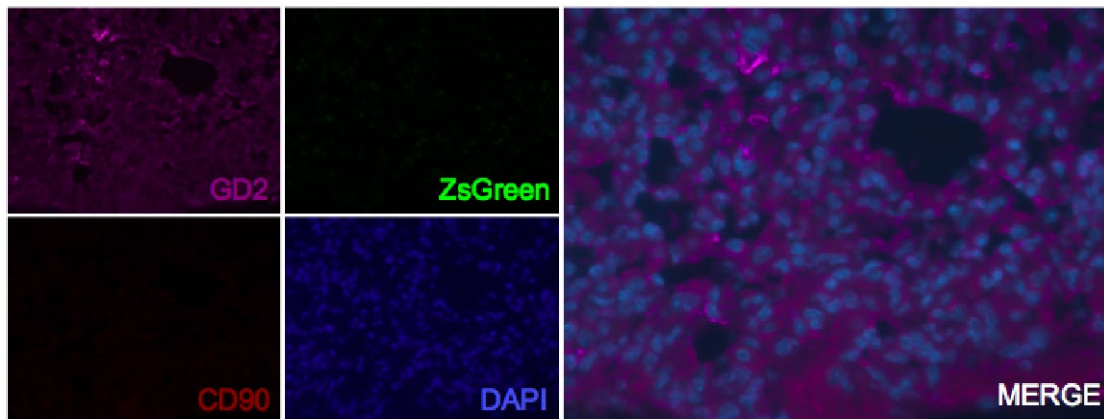

Supplemental Figure 1. Immunofluorescence staining for GD2, human CD90, ZsGreen and DAPI in osteosarcoma tumor section from nude mice without MSCs injection.

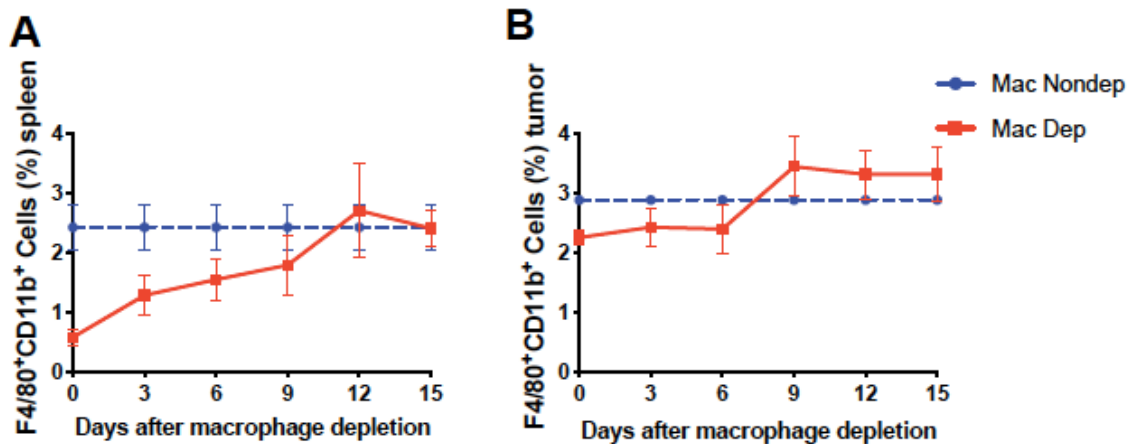

Supplemental Figure 2. Macrophage recovery in spleen (A) and tumor (B) after liposomal clodronate treatment.
